# Supplementary material for: The microRNA-218~Survivin axis regulates migration, invasion, and lymph node metastasis in cervical cancer
Source: PubMed Central journal article supplement (PMC4359219; doi:10.18632/oncotarget.2836), 2014-11-25
Supplement: oncotarget-06-1090-s001.pdf [file oncotarget-06-1090-s001.pdf]

## The microRNA-218~Survivin axis regulates migration, invasion, and lymph node metastasis in cervical cancer

### Supplementary Material

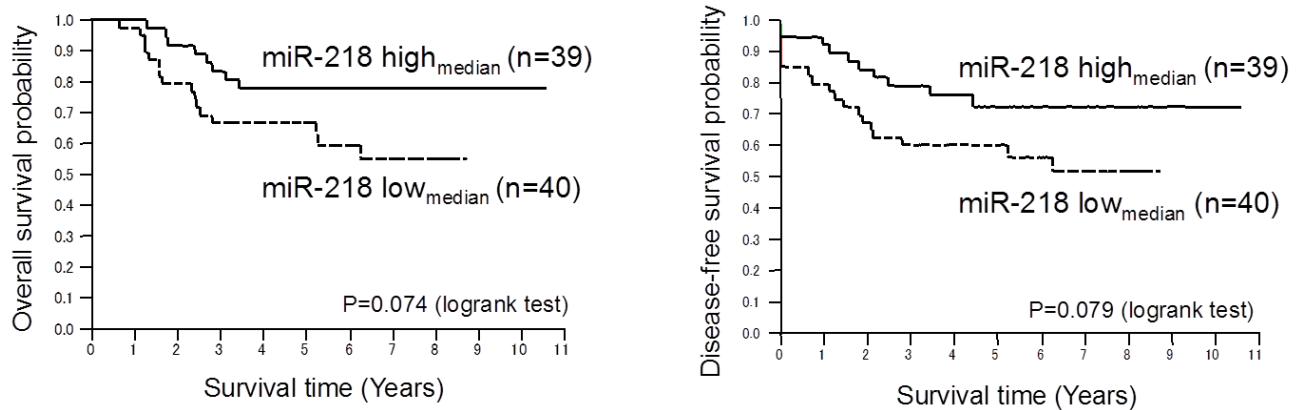

**Figure S1:** Kaplan-Meier analysis of overall (left) and disease-free (right) survival in 79 patients with cervical cancer. Solid line: patients with higher than median miR-218 expression level (n=39); dotted line: patients with lower than median miR-218 expression (n=40).

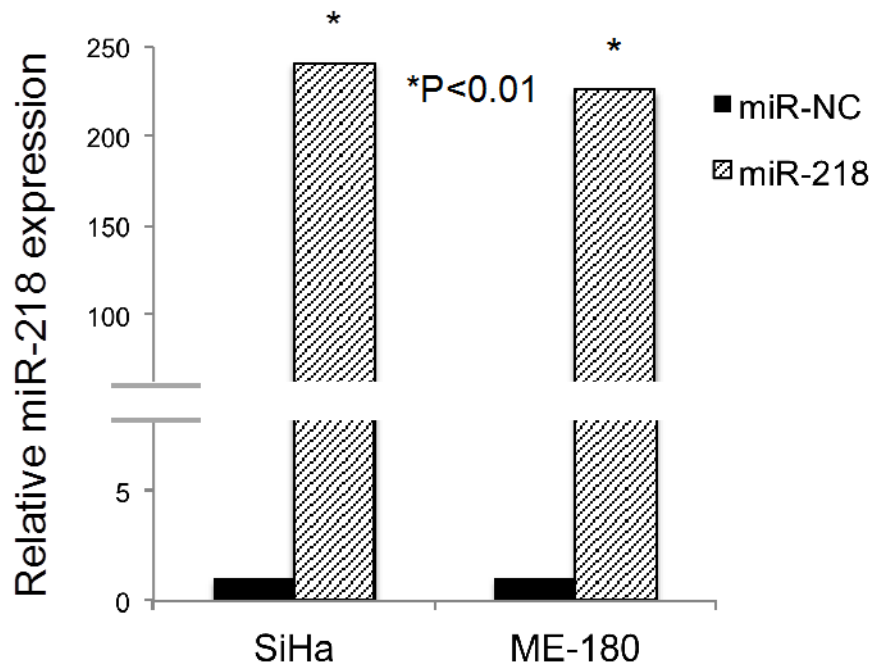

**Figure S2:** qRT-PCR analysis of miR-218 levels in SiHa and ME-180 cells after 48 h transfection with 10 nM each of pre-miR negative control (miR-NC) or pre-miR-218 (miR-218). miR-218 expression levels were normalized to RNU44 expression, relative to cells transfected with miR-NC.

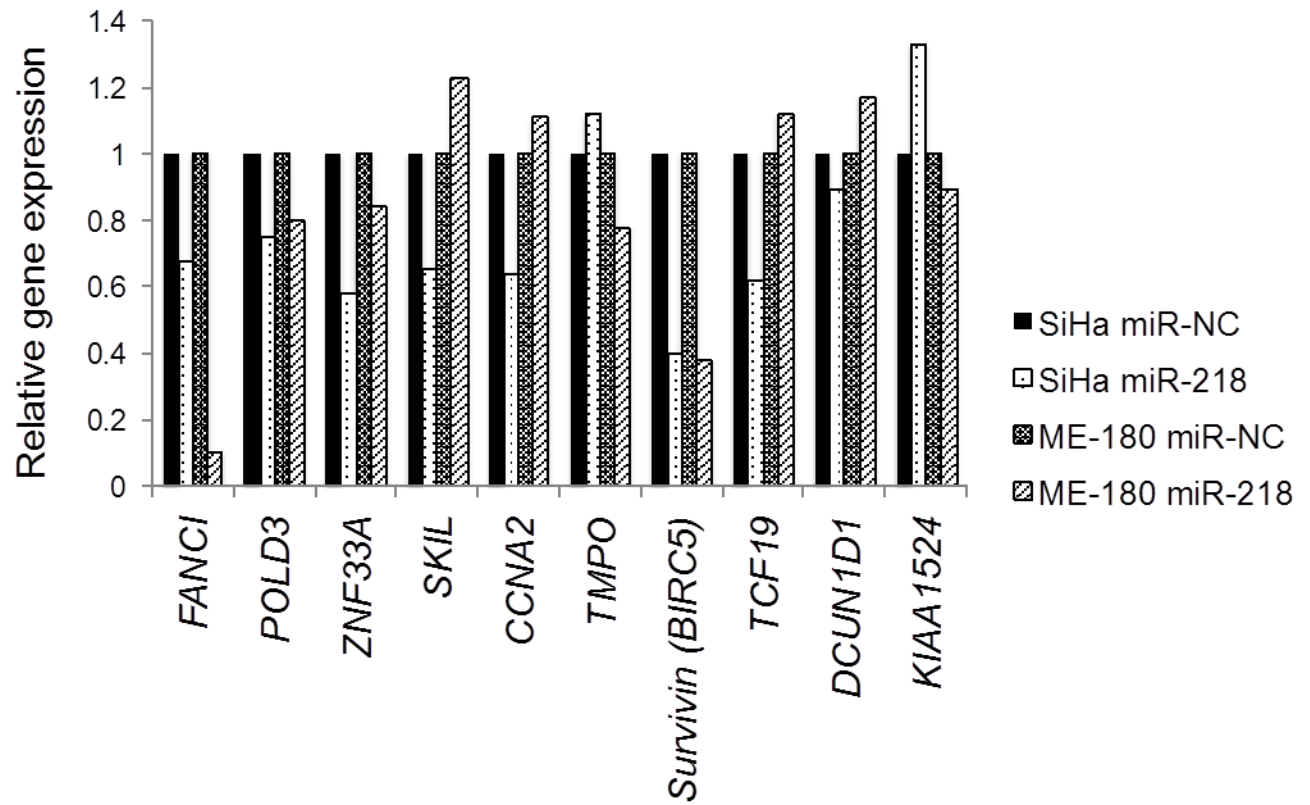

**Figure S3:** The expression of top 10 candidate genes were assayed using qRT-PCR after 48 hrs miR-218 or miR-NC transfection (10 nM each) in SiHa and ME-180 cells. Gene expression levels were normalized to GAPDH.

A)

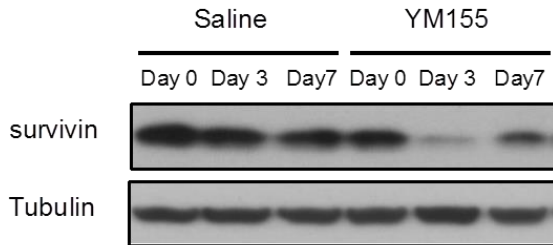

B)

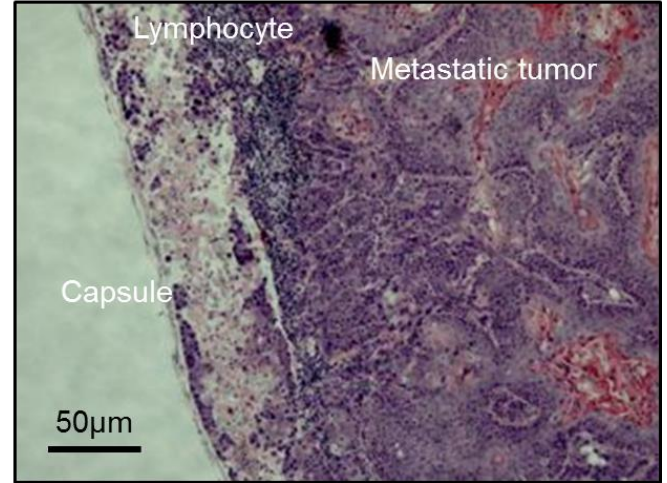

**Figure S4:** A) Intratumoral survivin expression. After subcutaneous tumor generation, YM155 (10 mg/kg/day) was subcutaneously administered to mice as a 3-day continuous infusion. Subcutaneous tumors were removed at days 0, 3, and 7 after YM155 treatment and intratumoral survivin levels were assessed using Western blotting. B) Representative histology of a metastatic lymph node (H&E staining) demonstrating the capsule of the lymph node, the lymphocyte infiltration, and the metastatic tumor deposit. Scale bar represents 50 μm. These metastatic lymph nodes were detected using bioluminescence.

**Table S1: 35 candidate genes for miR-218 targeting**

| Rank | Gene name        | Cancer (Up) rank | <i>In silico</i> rank | Sum of cancer (up) + <i>in silico</i> rank |
|------|------------------|------------------|-----------------------|--------------------------------------------|
| 1    | FANCI            | 26               | 157                   | 183                                        |
| 2    | POLD3            | 127              | 218                   | 345                                        |
| 3    | ZNF33A           | 134              | 272                   | 406                                        |
| 4    | SKIL             | 267              | 155                   | 422                                        |
| 5    | CCNA2            | 376              | 80                    | 456                                        |
| 6    | TMPO             | 174              | 377                   | 551                                        |
| 7    | Survivin (BIRC5) | 361              | 200                   | 561                                        |
| 8    | TCF19            | 433              | 151                   | 584                                        |
| 9    | DCUN1D1          | 292              | 303                   | 595                                        |
| 10   | KIAA1524         | 221              | 383                   | 604                                        |
| 11   | DNA2             | 111              | 495                   | 606                                        |
| 12   | ANLN             | 147              | 509                   | 656                                        |
| 13   | VPS13C           | 610              | 76                    | 686                                        |
| 14   | PHC3             | 635              | 116                   | 751                                        |
| 15   | DCP2             | 447              | 412                   | 859                                        |
| 16   | PCNP             | 570              | 382                   | 952                                        |
| 17   | COL10A1          | 652              | 307                   | 959                                        |
| 18   | RAD1             | 874              | 91                    | 965                                        |
| 19   | USP34            | 869              | 101                   | 970                                        |
| 20   | CPNE8            | 934              | 95                    | 1029                                       |
| 21   | TRAF5            | 851              | 238                   | 1089                                       |
| 22   | POLA1            | 1016             | 120                   | 1136                                       |
| 23   | CDCA7L           | 1020             | 120                   | 1140                                       |
| 24   | BCAT1            | 898              | 255                   | 1153                                       |
| 25   | GPAM             | 948              | 210                   | 1158                                       |
| 26   | HOXD10           | 1088             | 93                    | 1181                                       |
| 27   | RABGAP1L         | 1174             | 12                    | 1186                                       |
| 28   | ACPL2            | 951              | 277                   | 1228                                       |
| 29   | EGLN3            | 1102             | 134                   | 1236                                       |
| 30   | ZNF678           | 960              | 360                   | 1320                                       |
| 31   | DCBLD2           | 1052             | 283                   | 1335                                       |
| 32   | EMR2             | 1130             | 391                   | 1521                                       |
| 33   | COL1A1           | 1066             | 507                   | 1573                                       |
| 34   | KIAA1324         | 1416             | 185                   | 1601                                       |
| 35   | UGT8             | 1400             | 337                   | 1737                                       |

**Table S2:** Primer sequence used for qRT-PCR and cloning

| Gene              | Forward primer                              | Reverse primer                                                       |
|-------------------|---------------------------------------------|----------------------------------------------------------------------|
| Survivin (BIRC5)  | 5'-ACTTGGCCCAGTGTTCCTTCT-3'                 | 5'-ACTTGGCCCAGTGTTCCTTCT-3'                                          |
| GAPDH             | 5'-GAGTCAACGGATTTGGTCGT-3'                  | 5'-AATGAAGGGGTCATTGATGG-3'                                           |
| WT-survivin 3'UTR | 5'-GTTGTTACTAGTTGCATGACTTGTGTGT<br>GATGA-3' | 5'-GTTGTTAAGCTTAATGACTTAGAA<br>TGGCTTTGTGC-3'                        |
| MT-survivin 3'UTR |                                             | 5'-GTTGTTAAGCTTAATGACTTAGAATGGCT<br>TGTGTTGG AGTTTTAATTGTAGTTTGTG-3' |
| FANCI             | 5'-CCACCTTTGGTCTATCAGCTTC-3'                | 5'-CAACATCCAATAGCTCGTCACC-3'                                         |
| POLD3             | 5'-GAGTTCGTCACGGACCAAAAC-3'                 | 5'-GCCAGACACCAAGTAGGTAAC-3'                                          |
| ZNF33A            | 5'-AAGATGTGACTGTGGGCTTCA-3'                 | 5'-GATCACCTCTGGTTTGTGAAC-3'                                          |
| SKIL              | 5'-CCATCCTGTGGGCTGATTAC-3'                  | 5'-GGCCAATGAGCTTTTAGCAG-3'                                           |
| CCNA2             | 5'-GGATGGTAGTTTTGAGTCACCAC-3'               | 5'-CACGAGGATAGCTCTCATACTGT-3'                                        |
| TMPO              | 5'-CCCCTCGGTCTGACAAAAG-3'                   | 5'-CGCTCTTCGTCACTGGAGAA-3'                                           |
| TCF19             | 5'-GGGGCGGTGATCTCTACAC-3'                   | 5'-GGGAGTCGGACATTATTGACCA-3'                                         |
| DCUN1D1           | 5'-TCTGTGATGACCTGGCACTC-3'                  | 5'-TGTTTGGAGAAGCTCGCACTG -3'                                         |
| KIAA1524          | 5'-GAACGCCACTCAGCTTTTGC-3'                  | 5'-GAAGCACTTATGTTGGGGTCTT-3'                                         |
